# Supplementary figures and images for: Inferring ancestry with the hierarchical soft clustering approach tangleGen
Source: HighWire-hosted journal article supplement (doi:10.1101/gr.279399.124), 2024-10-21

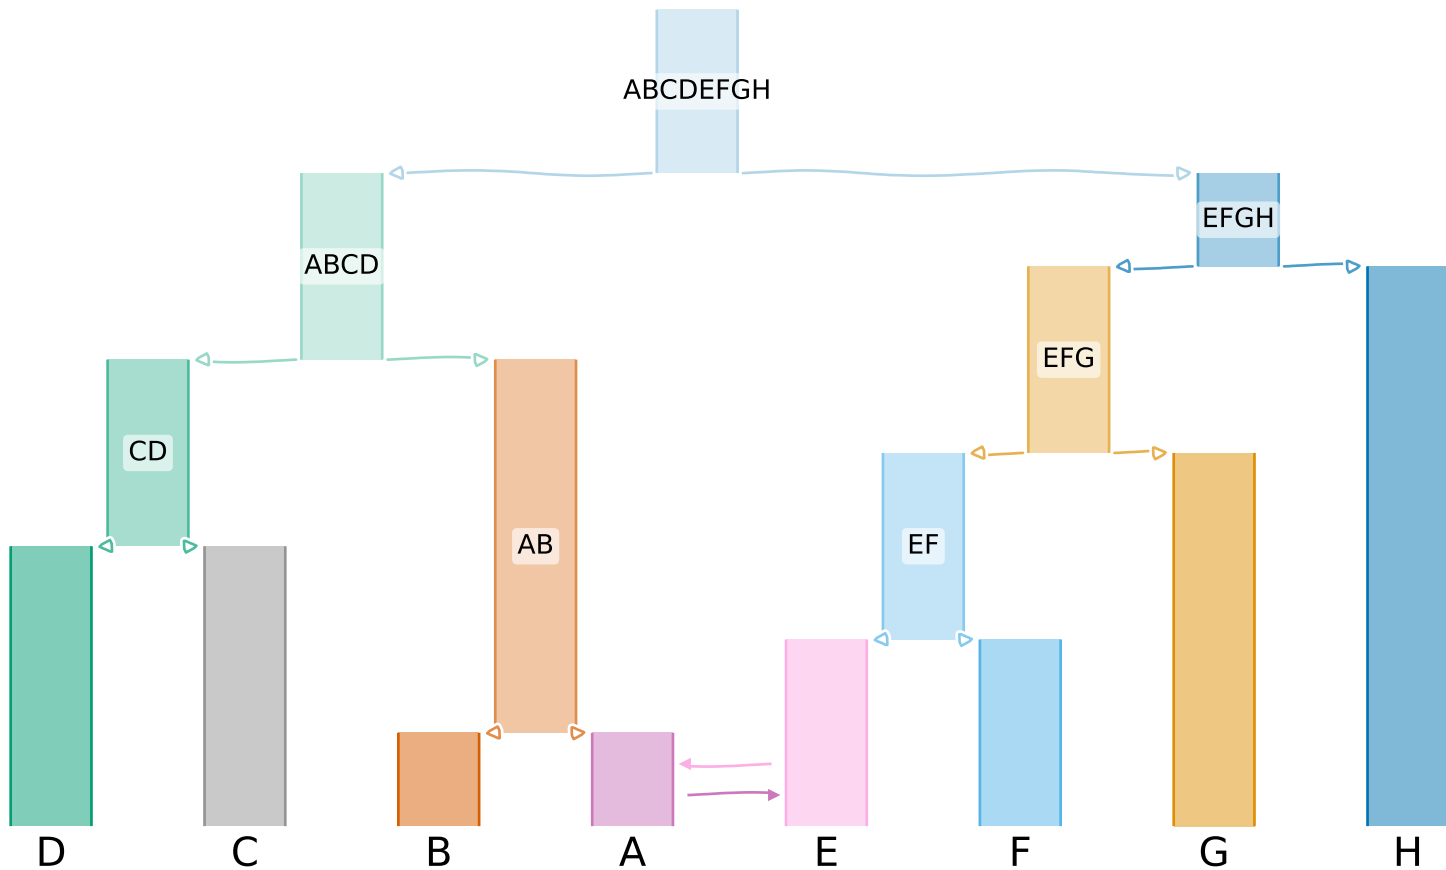

Supplement: Supplemental_Code.zip [file demographic_structure_n_800.pdf › Supplemental_Code/data/with_demography/demographic_structure_n_800.pdf]
